# Supplementary material
Source: publisher figshare collection journal article supplement (https://rs.figshare.com/ndownloader/files/13087289)
Supplement: Supplementary file 1 [file 13087289]

## Sheet: Table S3A
Individual ID	Sample ID	Microchip	Location	Gender	Year	DFTD Diagnosis	Marker
1	1T	982009102430562	Forestier	Female	2007	DFT1 confirmed	N, D1
2	2T	982009100773235	Forestier	Male	2007	DFT1 confirmed	N, D1
3	3T	982009100864506	Forestier	Female	2007	DFT1 confirmed	N, D1
4	4T	982009100866164	Forestier	Female	2007	DFT1 confirmed	N, D1
5	5T	982009104239392	Forestier	Male	2007	DFT1 confirmed	N, D1
6	6T	982009102521579	Forestier	Male	2007	DFT1 confirmed	N, D1
8	8T2	982009104869208	West Pencil Pine	Female	2007	DFT1 confirmed	N, D1
9	9T	982009104968776	West Pencil Pine	Female	2007	DFT1 confirmed	N, D1
10	10T2	982009100662150	Bronte Park	Male	2007	DFT1 confirmed	N, D1
18	18T	Unknown	St Marys	Male	2006	DFT1 confirmed	N, D1
19	19T	982009100818962	St Marys	Male	2006	DFT1 confirmed	N, D1
36	36T2a	982009102375594	Reedy Marsh	Female	2007	DFT1 confirmed	N, D1
51	51T1	982009104847105	Kempton	Male	2008	DFT1 confirmed	N, D1
51	51T2	982009104847105	Kempton	Male	2008	DFT1 confirmed	N, D1
52	52T1	982009105188074	Freycinet	Male	2008	DFT1 confirmed	N, D1
52	52T2	982009105188074	Freycinet	Male	2008	DFT1 confirmed	N, D1
53	53T2	982009100418077	Narawntapu	Male	2007	DFT1 confirmed	N, D1
53	53T3	982009100418077	Narawntapu	Male	2007	DFT1 confirmed	N
54	54T1	982009104855230	West Pencil Pine	Female	2008	DFT1 confirmed	N, D1
55	55T1	000658C2A0	Mole Creek	Male	2007	DFT1 confirmed	N, D1
55	55T2	000658C2A0	Mole Creek	Male	2007	DFT1 confirmed	N, D1
55	55T3	000658C2A0	Mole Creek	Male	2007	DFT1 confirmed	N
55	55T4	000658C2A0	Mole Creek	Male	2007	DFT1 confirmed	N
56	56T1	982009104808995	Upper Natone	Male	2007	DFT1 confirmed	N, D1
56	56T2	982009104808995	Upper Natone	Male	2007	DFT1 confirmed	N, D1
57	57T1	982009104859904	Narawntapu	Male	2008	DFT1 confirmed	N, D1
58	58T1	982009100906846	Forestier	Male	2007	DFT1 confirmed	N, D1
59	59T1	982009100823186	Forestier	Female	2007	DFT1 confirmed	N, D1
59	59T2	982009100823186	Forestier	Female	2007	DFT1 confirmed	N, D1
59	59T3	982009100823186	Forestier	Female	2007	DFT1 confirmed	N, D1
61	61T	982009104809064	Forestier	Male	2008	DFT1 confirmed	N, D1
63	63T1	982009104248590	Forestier	Male	2008	DFT1 confirmed	N
63	63T2	982009104248590	Forestier	Male	2008	DFT1 confirmed	N, D1
63	63T3	982009104248590	Forestier	Male	2008	DFT1 confirmed	N, D1
64	64T	982009104836888	Forestier	Male	2008	DFT1 confirmed	N, D1
65	65T	982009104811311	Forestier	Male	2008	DFT1 confirmed	N, D1
66	66T1	982009105171583	Forestier	Male	2008	DFT1 confirmed	N, D1
66	66T2	982009105171583	Forestier	Male	2008	DFT1 confirmed	N, D1
66	66T3	982009105171583	Forestier	Male	2008	DFT1 confirmed	N, D1
66	66T4	982009105171583	Forestier	Male	2008	DFT1 confirmed	N, D1
66	66T5	982009105171583	Forestier	Male	2008	DFT1 confirmed	N
66	66T6	982009105171583	Forestier	Male	2008	DFT1 confirmed	N, D1
67	67T	982009104869228	Forestier	Female	2008	DFT1 confirmed	N, D1
68	68T	982009104839923	Forestier	Male	2008	DFT1 confirmed	N, D1
75	75T	982009100754517	Forestier	Male	2007	DFT1 confirmed	N, D1
76	76T1	982009100303073	Forestier	Male	2007	DFT1 confirmed	N, D1
77	77T1a	982009104849679	Forestier	Male	2010	DFT1 confirmed	N, D1
78	78Ta	982009104925238	Forestier	Female	2010	DFT1 confirmed	N, D1
79	79Ta	982009104840088	Forestier	Male	2010	DFT1 confirmed	N, D1
80	80T1	982009104789723	Forestier	Male	2010	DFT1 confirmed	N, D1
80	80T2	982009104789723	Forestier	Male	2010	DFT1 confirmed	N, D1
81	81T	982009105195643	Forestier	Male	2010	DFT1 confirmed	N, D1
85	85T	985120016084089	Fentonbury	Unknown	2005	DFT1 confirmed	N, D1
93	93T	982009104234739	Forestier	Male	2010	DFT1 confirmed	N, D1
94	94T	982009104876128	Forestier	Male	2010	DFT1 confirmed	N, D1
95	95T	1678	Geeveston	Male	2009	DFT1 confirmed	N, D1
96	96T	982009101668435	Bronte Park	Unknown	2004	DFT1 confirmed	N, D1
98	98T1	982009105169257	Forestier	Male	2010	DFT1 confirmed	N, D1
99	99T3	982009104879401	Forestier	Male	2010	DFT1 confirmed	N, D1
100	100T1	982009104925396	Forestier	Male	2010	DFT1 confirmed	N, D1
101	101T1	MTP000000101673	Buckland	Female	2010	DFT1 confirmed	N, D1
101	101T2	MTP000000101673	Buckland	Female	2010	DFT1 confirmed	N, D1
102	102T1	982009106034997	Buckland	Male	2010	DFT1 confirmed	N
102	102T2	982009106034997	Buckland	Male	2010	DFT1 confirmed	N, D1
105	105T	982009105161869	West Pencil Pine	Female	2010	DFT1 confirmed	N, D1
107	107T1	982009104864698	Forestier	Female	2010	DFT1 confirmed	N, D1
108	108T1	982009106165902	Narawntapu	Female	2010	DFT1 confirmed	N, D1
109	109T1	982009104878613	Forestier	Female	2010	DFT1 confirmed	N, D1
110	110T1	982009106029841	Latrobe	Male	2010	DFT1 confirmed	N, D1
111	111T1	982009104919715	Forestier	Male	2010	DFT1 confirmed	N, D1
112	112T2	982009104928455	Forestier	Male	2010	DFT1 confirmed	N, D1
113	113T1	982009104874627	Forestier	Female	2010	DFT1 confirmed	N, D1
115	115T1	982009104960576	Forestier	Female	2010	DFT1 confirmed	N, D1
117	117T	982009104883696	Narawntapu	Male	2010	DFT1 confirmed	N, D1
118	118T	982009106039114	Narawntapu	Male	2010	DFT1 confirmed	N, D1
119	119T	982009105380276	Narawntapu	Male	2010	DFT1 confirmed	N, D1
127	127T	982009105139081	West Pencil Pine	Male	2010	DFT1 confirmed	N, D1
132	132T	982000123133145	Bronte Park	Male	2011	DFT1 confirmed	N, D1
133	133T	982000123208174	Bronte Park	Female	2011	DFT1 confirmed	N
134	134T1	982000123128642, 982000123128645	Bronte Park	Male	2011	DFT1 confirmed	N, D1
134	134T2	982000123128642, 982000123128645	Bronte Park	Male	2011	DFT1 confirmed	N, D1
134	134T3	982000123128642, 982000123128645	Bronte Park	Male	2011	DFT1 confirmed	N, D1
134	134T4	982000123128642, 982000123128645	Bronte Park	Male	2011	DFT1 confirmed	N, D1
134	134T5	982000123128642, 982000123128645	Bronte Park	Male	2011	DFT1 confirmed	N, D1
134	134T6	982000123128642, 982000123128645	Bronte Park	Male	2011	DFT1 confirmed	N, D1
134	134T7	982000123128642, 982000123128645	Bronte Park	Male	2011	DFT1 confirmed	N, D1
135	135T1	982000123216973	Bronte Park	Female	2011	DFT1 confirmed	N, D1
135	135T2a	982000123216973	Bronte Park	Female	2011	DFT1 confirmed	N, D1
135	135T3a	982000123216973	Bronte Park	Female	2011	DFT1 confirmed	N, D1
154	154T2	982009106212306	West Pencil Pine	Male	2012	DFT1 confirmed	N, D1
160	160T	982009105958355	West Pencil Pine	Female	2012	DFT1 confirmed	N, D1
161	161T1	982009104841875	West Pencil Pine	Female	2011	DFT1 confirmed	N
161	161T2	982009104841875	West Pencil Pine	Female	2011	DFT1 confirmed	N, D1
162	162T	982009104236435	West Pencil Pine	Female	2012	DFT1 confirmed	N, D1
163	163T	982009105954423	West Pencil Pine	Female	2012	DFT1 confirmed	N, D1
164	164T	982009106155334	West Pencil Pine	Male	2012	DFT1 confirmed	N, D1
165	165T	982009106209752	West Pencil Pine	Male	2012	DFT1 confirmed	N, D1
165	165T3	982009106209752	West Pencil Pine	Male	2012	DFT1 confirmed	N, D1
165	165T4	982009106209752	West Pencil Pine	Male	2012	DFT1 confirmed	N, D1
166	166T	982009106128168	West Pencil Pine	Male	2011	DFT1 confirmed	N, D1
166	166T4	982009106128168	West Pencil Pine	Male	2011	DFT1 confirmed	N, D1
167	167T1	982009104253781	West Pencil Pine	Male	2011	DFT1 confirmed	N, D1
167	167T2	982009104253781	West Pencil Pine	Male	2011	DFT1 confirmed	N, D1
167	167T3	982009104253781	West Pencil Pine	Male	2011	DFT1 confirmed	N, D1
168	168T	982009106205647	West Pencil Pine	Female	2012	DFT1 confirmed	N, D1
170	170T	982009104925282	West Pencil Pine	Female	2011	DFT1 confirmed	N, D1
172	172T1	982009104267534	West Pencil Pine	Male	2011	DFT1 confirmed	N, D1
174	174T1	982009106160463	West Pencil Pine	Female	2014	DFT1 confirmed	N, D1
175	175T1	982009104249741	West Pencil Pine	Male	2011	DFT1 confirmed	N, D1
176	176T1	982009104240078	West Pencil Pine	Female	2011	DFT1 confirmed	N, D1
178	178T1	982009104871888	West Pencil Pine	Male	2011	DFT1 confirmed	N, D1
178	178T2	982009104871888	West Pencil Pine	Male	2011	DFT1 confirmed	N, D1
178	178T3	982009104871888	West Pencil Pine	Male	2011	DFT1 confirmed	N, D1
179	179T1	982009104252932	West Pencil Pine	Female	2012	DFT1 confirmed	N, D1
181	181T1	982009104785985	West Pencil Pine	Male	2011	DFT1 confirmed	N, D1
182	182T1	982009106164254	West Pencil Pine	Male	2011	DFT1 confirmed	N, D1
183	183T1	982009104723252	West Pencil Pine	Female	2011	DFT1 confirmed	N, D1
185	185T1	982009106035814	West Pencil Pine	Female	2012	DFT1 confirmed	N
186	186T1	982009104845348	West Pencil Pine	Male	2011	DFT1 confirmed	N
187	187T1	982009104809417	West Pencil Pine	Male	2011	DFT1 confirmed	N, D1
188	188T1	982009105154207	West Pencil Pine	Female	2011	DFT1 confirmed	N, D1
189	189T1	982009106132103	West Pencil Pine	Female	2011	DFT1 confirmed	N, D1
207	207T1	982000356444429	Grove	Female	2015	DFT1 confirmed	N, D1
207	207T2	982000356444429	Grove	Female	2015	DFT1 confirmed	N, D1
207	207T3	982000356444429	Grove	Female	2015	DFT1 confirmed	N, D1
209	209T1	SDD000000100315	Crabtree	Male	2015	DFT1 confirmed	N, D1
209	209T2	SDD000000100315	Crabtree	Male	2015	DFT1 confirmed	N, D1
209	209T3	SDD000000100315	Crabtree	Male	2015	DFT1 confirmed	N, D1
211	211T	R0000000004063	Zeehan	Male	2014	DFT1 confirmed	N, D1
213	213T2	S00000000006241	Leslie Vale	Female	2015	DFT1 confirmed	N, D1
214	214T	982009102327363	Reedy Marsh	Male	2007	DFT1 confirmed	N, D1
215	215T	985120016021248	Fentonbury	Male	2005	DFT1 confirmed	N, D1
216	216T	Unknown	Tea Tree	Female	2005	DFT1 confirmed	N, D1
217	217T	Unknown	Brighton	Female	2006	DFT1 confirmed	N, D1
218	218T	982009104842051	Buckland	Male	2006	DFT1 confirmed	N, D1
219	219T	982009104354742	St Marys	Female	2006	DFT1 confirmed	N, D1
220	220T	982009100873958	Freycinet	Male	2007	DFT1 confirmed	N, D1
221	221T	Unknown	Triabunna	Female	2009	DFT1 confirmed	N, D1
272	272T1	982000123216701	Buckland	Female	2015	DFT1 confirmed	N, D1
272	272T2	982000123216701	Buckland	Female	2015	DFT1 confirmed	N, D1
272	272T3	982000123216701	Buckland	Female	2015	DFT1 confirmed	N, D1
272	272T4	982000123216701	Buckland	Female	2015	DFT1 confirmed	N, D1
272	272T5	982000123216701	Buckland	Female	2015	DFT1 confirmed	N, D1
327	327T	SDD000000310315	Channel Peninsula	Male	2015	DFT1 confirmed	N, D1
331	331T	Unknown	Kempton	Male	2012	DFT1 confirmed	N, D1
332	332T	Unknown	Kempton	Female	2012	DFT1 confirmed	N, D1
333	333Ta	Unknown	Hamilton	Female	2012	DFT1 confirmed	N, D1
334	334T1	982000361977435	Kaoota	Female	2015	DFT1 confirmed	N, D1
334	334T2	982000361977435	Kaoota	Female	2015	DFT1 confirmed	N, D1
334	334T3	982000361977435	Kaoota	Female	2015	DFT1 confirmed	N, D1
335	335T	982000356711103	Channel Peninsula	Male	2015	DFT1 confirmed	N, D1
336	336T	982009104799360	Channel Peninsula	Female	2015	DFT1 confirmed	N, D1
342	342T1	00065DC74E	Mole Creek	Female	2010	DFT1 confirmed	N, D1
343	343T1	982009106486809	Forestier	Female	2010	DFT1 confirmed	N, D1
344	344T1	982009104866449	Forestier	Female	2010	DFT1 confirmed	N, D1
345	345T1	982009104907551	Forestier	Male	2010	DFT1 confirmed	N, D1
346	346T1	982009104720533	Forestier	Male	2010	DFT1 confirmed	N, D1
347	347T1	9850016002623	Forestier	Female	2010	DFT1 confirmed	N, D1
348	348T1	982009106481563	Natone	Male	2010	DFT1 confirmed	N, D1
350	350T1	982009106165359	Forestier	Male	2010	DFT1 confirmed	N, D1
351	351T1	982009106037893	Waratah	Female	2010	DFT1 confirmed	N, D1
353	353T1	S2918	Richmond	Female	2011	DFT1 confirmed	N, D1
354	354T1	S2919	Huon	Male	2011	DFT1 confirmed	N, D1
356	356T1	9653000124785C	Forth	Female	2011	DFT1 confirmed	N, D1
357	357T1	982009106364381	Forestier	Female	2011	DFT1 confirmed	N, D1
358	358T3	982009106218282	Freycinet	Female	2011	DFT1 confirmed	N, D1
360	360T1	982000123128375	Waratah	Male	2011	DFT1 confirmed	N, D1
361	361T2	982009104829917	Zeehan	Female	2011	DFT1 confirmed	N, D1
364	364T1	982000123210100	Kempton	Female	2012	DFT1 confirmed	N, D1
365	365T2	982009104719592	West Pencil Pine	Female	2012	DFT1 confirmed	N, D1
366	366T1	Unknown	Kentish	Male	2003	DFT1 confirmed	N, D1
368	368T1	Unknown	Forestier	Male	2003	DFT1 confirmed	N, D1
370	370T1	Unknown	Epping Forest	Female	2003	DFT1 confirmed	N, D1
371	371T1	Unknown	Bronte Park	Male	2003	DFT1 confirmed	N, D1
372	372T1	Unknown	Bronte Park	Male	2003	DFT1 confirmed	N, D1
374	374T1	Unknown	Bronte Park	Female	2004	DFT1 confirmed	N, D1
375	375T2	982009101473700	Bronte Park	Male	2004	DFT1 confirmed	N, D1
377	377T1	Unknown	Epping Forest	Female	2004	DFT1 confirmed	N, D1
378	378T1	Unknown	Epping Forest	Female	2004	DFT1 confirmed	N, D1
379	379T1	Unknown	New Norfolk	Female	2005	DFT1 confirmed	N, D1
380	380T1	985120016083419	Forestier	Male	2006	DFT1 confirmed	N, D1
381	381T1	Unknown	Bothwell	Female	2006	DFT1 confirmed	N, D1
383	383T1	Unknown	Forestier	Male	2006	DFT1 confirmed	N, D1
384	384T1	Unknown	Deloraine	Female	2006	DFT1 confirmed	N, D1
385	385T1	982009104272755	Forestier	Female	2006	DFT1 confirmed	N, D1
386	386T1	985120016077276	Forestier	Female	2007	DFT1 confirmed	N, D1
389	389T1	00065DC9C5	Mole Creek	Female	2007	DFT1 confirmed	N, D1
390	390T1	982009100876802	Freycinet	Female	2007	DFT1 confirmed	N, D1
392	392T5	982009100917481	Fentonbury	Male	2007	DFT1 confirmed	N, D1
393	393T1	982009102235882	Fentonbury	Female	2007	DFT1 confirmed	N, D1
394	394T5	982009100831798	Fentonbury	Female	2007	DFT1 confirmed	N, D1
395	395T1	982009102247939	Freycinet	Male	2007	DFT1 confirmed	N, D1
396	396T1	982009104815428	West Pencil Pine	Male	2007	DFT1 confirmed	N, D1
397	397T2	982009104267602	Westbury	Female	2007	DFT1 confirmed	N, D1
398	398T1	982009102626938	Reedy Marsh	Female	2007	DFT1 confirmed	N, D1
399	399T1	Unknown	Forestier	Female	2007	DFT1 confirmed	N, D1
400	400T1	982009105155409	Fentonbury	Male	2007	DFT1 confirmed	N, D1
401	401T1	982009100771787	Forestier	Male	2007	DFT1 confirmed	N, D1
402	402T1	982009100887589	Forestier	Female	2007	DFT1 confirmed	N, D1
403	403T1	982009100365437	Forestier	Female	2007	DFT1 confirmed	N, D1
404	404T1	982009104835261	Forestier	Female	2007	DFT1 confirmed	N, D1
405	405T1	982009105131115	Gunns Plains	Female	2007	DFT1 confirmed	N, D1
406	406T1	Unknown	New Norfolk	Female	2008	DFT1 confirmed	N, D1
407	407T1	Unknown	Mole Creek	Male	2008	DFT1 confirmed	N, D1
408	408T1	Unknown	West Pencil Pine	Female	2008	DFT1 confirmed	N, D1
409	409T1	Unknown	Deloraine	Female	2008	DFT1 confirmed	N, D1
410	410T1	982009104833287	Forestier	Male	2008	DFT1 confirmed	N, D1
411	411T1	Unknown	Burnie	Male	2008	DFT1 confirmed	N, D1
412	412T1	Unknown	Kempton	Female	2008	DFT1 confirmed	N, D1
413	413T1	982009104720454	Kempton	Female	2008	DFT1 confirmed	N, D1
414	414T1	982009104881646	Kempton	Male	2008	DFT1 confirmed	N, D1
415	415T1	982009105145532	West Pencil Pine	Male	2008	DFT1 confirmed	N, D1
416	416T1	982009104916387	Glen Huon	Male	2008	DFT1 confirmed	N, D1
417	417T1	982009104906614	Kempton	Female	2008	DFT1 confirmed	N, D1
419	419T1	985120016082881	Narawntapu	Female	2008	DFT1 confirmed	N, D1
420	420T1	982009104805663	Lake Rowallan	Male	2008	DFT1 confirmed	N, D1
421	421T1	982009104349644	Ringarooma	Male	2008	DFT1 confirmed	N, D1
422	422T1	982009104358247	Ringarooma	Male	2008	DFT1 confirmed	N, D1
423	423T1	982009105139133	Deloraine	Female	2008	DFT1 confirmed	N, D1
424	424T1	982009104836906	Glen Huon	Female	2008	DFT1 confirmed	N, D1
425	425T1	982009104822360	Glen Huon	Female	2008	DFT1 confirmed	N, D1
426	426T1	982009104867987	Glen Huon	Female	2008	DFT1 confirmed	N, D1
428	428T1	982009102236127	Narawntapu	Female	2008	DFT1 confirmed	N, D1
429	429T1	982009104937739	Burnie	Male	2008	DFT1 confirmed	N, D1
432	432T1	982009104798550	Forestier	Female	2008	DFT1 confirmed	N, D1
433	433T1	982009104931509	Forestier	Male	2008	DFT1 confirmed	N, D1
434	434T1	982009105525819	Spreyton	Female	2009	DFT1 confirmed	N
436	436T1	982009104839874	Forestier	Male	2009	DFT1 confirmed	N, D1
437	437T	Unknown	Brighton	Female	2009	DFT1 confirmed	N, D1
438	438T1	982009104927999	Forestier	Male	2009	DFT1 confirmed	N, D1
439	439T1	985154000001118	Prospect	Female	2009	DFT1 confirmed	N, D1
440	440T1	00065D7B0B	Mole Creek	Female	2009	DFT1 confirmed	N, D1
442	442T1	982009104868613	Forestier	Female	2009	DFT1 confirmed	N, D1
444	444T1	982009100675446	Forestier	Male	2009	DFT1 confirmed	N, D1
445	445T1	982009104857449	Forestier	Male	2009	DFT1 confirmed	N, D1
446	446T1	98515400001131	Mt Field	Male	2009	DFT1 confirmed	N, D1
447	447T1	982009105195861	Bicheno	Female	2009	DFT1 confirmed	N, D1
448	448T1	982009106097132	Ringarooma	Female	2009	DFT1 confirmed	N, D1
449	449T1	982009104841247	Forestier	Female	2009	DFT1 confirmed	N, D1
450	450T1	956000001052372	Mole Creek	Male	2009	DFT1 confirmed	N, D1
451	451T1	MTP000000093427	Scottsdale	Unknown	2009	DFT1 confirmed	N, D1
453	453T1	982009104867670	Forestier	Female	2009	DFT1 confirmed	N, D1
454	454T1	982009104872692	Forestier	Male	2009	DFT1 confirmed	N, D1
455	455T1	982009100373762	Forestier	Female	2009	DFT1 confirmed	N, D1
493	493T1	982000190525865	Granville Harbour	Male	2016	DFT1 confirmed	N, D1
493	493T2	982000190525865	Granville Harbour	Male	2016	DFT1 confirmed	N, D1
499	499T1	982000190609582	Granville Harbour	Male	2016	DFT1 confirmed	N, D1
528	528T1	982009106151231, 982000363360184	Granville Harbour	Female	2016	DFT1 confirmed	N, D1
540	540T1	982009106211869	Granville Harbour	Male	2015	DFT1 confirmed	N, D1
540	540T4	982009106211869	Granville Harbour	Male	2015	DFT1 confirmed	N, D1
614	614T1	Unknown	Fentonbury	Female	2005	DFT1 confirmed	N, D1
615	615T1	982009100874204	Bronte Park	Female	2005	DFT1 confirmed	N, D1
617	617T1	Unknown	Kimberley	Female	2006	DFT1 confirmed	N, D1
618	618T1	Unknown	Railton	Male	2006	DFT1 confirmed	N, D1
619	619T1	982009104253089	West Pencil Pine	Male	2006	DFT1 confirmed	N, D1
620	620T1	985120016113034	Narawntapu	Male	2006	DFT1 confirmed	N, D1
627	627T1	982000356432649	Bronte Park	Male	2015	DFT1 confirmed	N, D1
628	628T1	982000191009681	Fentonbury	Female	2015	DFT1 confirmed	N, D1
628	628T2	982000191009681	Fentonbury	Female	2015	DFT1 confirmed	N, D1
628	628T3	982000191009681	Fentonbury	Female	2015	DFT1 confirmed	N, D1
629	629T1	982000191015685	Fentonbury	Female	2015	DFT1 confirmed	N, D1
630	630T1	982000363454290	Fentonbury	Male	2015	DFT1 confirmed	N, D1
631	631T1	982000363283082	Granville Harbour	Male	2015	DFT1 confirmed	N, D1
632	632T1	982000356526482	Kempton	Female	2015	DFT1 confirmed	N, D1
633	633T1	982000356643614	Kempton	Male	2015	DFT1 confirmed	N, D1
634	634T1	982000356574868	Takone	Female	2015	DFT1 confirmed	N, D1
634	634T2	982000356574868	Takone	Female	2015	DFT1 confirmed	N, D1
635	635T1	982009106575584	Takone	Male	2015	DFT1 confirmed	N, D1
635	635T2	982009106575584	Takone	Male	2015	DFT1 confirmed	N, D1
639	639T1	982000363452126	Stony Head	Male	2015	DFT1 confirmed	N, D1
640	640T1	982000362056744	Stony Head	Male	2015	DFT1 confirmed	N
643	643T1	982000123210419	Bronte Park	Female	2015	DFT1 confirmed	N, D1
669	669T1	982000363454373	Fentonbury	Female	2015	DFT1 confirmed	N, D1
669	669T2	982000363454373	Fentonbury	Female	2015	DFT1 confirmed	N, D1
669	669T3	982000363454373	Fentonbury	Female	2015	DFT1 confirmed	N, D1
669	669T4	982000363454373	Fentonbury	Female	2015	DFT1 confirmed	N, D1
669	669T5	982000363454373	Fentonbury	Female	2015	DFT1 confirmed	N, D1
669	669T6	982000363454373	Fentonbury	Female	2015	DFT1 confirmed	N, D1
678	678T1	982000363458490	Granville Harbour	Female	2016	DFT1 confirmed	N, D1
700	700T1	982000356643710	Kempton	Female	2016	DFT1 confirmed	N, D1
700	700T2	982000356643710	Kempton	Female	2016	DFT1 confirmed	N, D1
700	700T3	982000356643710	Kempton	Female	2016	DFT1 confirmed	N, D1
805	805T1	Unknown	Campania	Male	2015	DFT1 confirmed	N, D1
805	805T2	Unknown	Campania	Male	2015	DFT1 confirmed	N, D1
805	805T3	Unknown	Campania	Male	2015	DFT1 confirmed	N, D1
820	820T1	982009106207596	Judbury	Female	2012	DFT1 confirmed	N, D1
821	821T2	Unknown	Forestier	Male	2010	DFT1 confirmed	N, D1
822	822T1	Unknown	West Pencil Pine	Unknown	2009	DFT1 confirmed	N, D1
874	874T1	Unknown	Campania	Female	2016	DFT1 confirmed	N, D1
875	875T1	Unknown	Channel Peninsula	Male	2016	DFT1 confirmed	N, D1
875	875T10	Unknown	Channel Peninsula	Male	2016	DFT1 confirmed	N, D1
875	875T2	Unknown	Channel Peninsula	Male	2016	DFT1 confirmed	N, D1
875	875T3	Unknown	Channel Peninsula	Male	2016	DFT1 confirmed	N, D1
875	875T4	Unknown	Channel Peninsula	Male	2016	DFT1 confirmed	N, D1
875	875T6	Unknown	Channel Peninsula	Male	2016	DFT1 confirmed	N, D1
875	875T7	Unknown	Channel Peninsula	Male	2016	DFT1 confirmed	N, D1
875	875T8	Unknown	Channel Peninsula	Male	2016	DFT1 confirmed	N, D1
876	876T1	Unknown	Ross	Female	2016	DFT1 confirmed	N, D1
876	876T2	Unknown	Ross	Female	2016	DFT1 confirmed	N, D1
878	878T1	982000363392445	Kempton	Male	2016	DFT1 confirmed	N, D1
878	878T2	982000363392445	Kempton	Male	2016	DFT1 confirmed	N, D1
879	879T1	982000363462228	Bronte Park	Female	2016	DFT1 confirmed	N, D1
879	879T2	982000363462228	Bronte Park	Female	2016	DFT1 confirmed	N, D1
879	879T3	982000363462228	Bronte Park	Female	2016	DFT1 confirmed	N, D1
879	879T4	982000363462228	Bronte Park	Female	2016	DFT1 confirmed	N, D1
879	879T5	982000363462228	Bronte Park	Female	2016	DFT1 confirmed	N, D1
879	879T6	982000363462228	Bronte Park	Female	2016	DFT1 confirmed	N, D1
879	879T7	982000363462228	Bronte Park	Female	2016	DFT1 confirmed	N, D1
880	880T1	982000363392584	Bronte Park	Male	2016	DFT1 confirmed	N, D1
881	881T1	982000405794404	Fentonbury	Male	2016	DFT1 confirmed	N, D1
881	881T2	982000405794404	Fentonbury	Male	2016	DFT1 confirmed	N, D1
881	881T3	982000405794404	Fentonbury	Male	2016	DFT1 confirmed	N, D1
922	922T1	982000167811158	Takone	Male	2016	DFT1 confirmed	N, D1
922	922T2	982000167811158	Takone	Male	2016	DFT1 confirmed	N, D1
985	985T1	982000365467404	Fentonbury	Female	2016	DFT1 confirmed	N, D1
986	986T1	982000365504543	Fentonbury	Female	2016	DFT1 confirmed	N, D1
987	987T2	900006000172391	Takone	Female	2016	DFT1 confirmed	N, D1
987	987T5	900006000172391	Takone	Female	2016	DFT1 confirmed	N, D1
990	990T1	982000365130154	Fentonbury	Female	2016	DFT1 confirmed	N, D1
998	998T1	Unknown	Hastings	Male	2016	DFT1 confirmed	N, D1
999	999T1	Unknown	Lower Longley	Female	2016	DFT1 confirmed	N, D1
999	999T2	Unknown	Lower Longley	Female	2016	DFT1 confirmed	N, D1
999	999T3	Unknown	Lower Longley	Female	2016	DFT1 confirmed	N, D1
999	999T6	Unknown	Lower Longley	Female	2016	DFT1 confirmed	N, D1
1000	1000T1	982000363393469	Warrane	Female	2016	DFT1 confirmed	N
1002	1002T1	982009104789608	West Pencil Pine	Male	2012	DFT1 confirmed	N, D1
1010	1010T1	982000167781717	West Pencil Pine	Female	2012	DFT1 confirmed	N, D1
1014	1014T1	982009106154889	West Pencil Pine	Male	2012	DFT1 confirmed	N, D1
1019	1019T1	982009106145258	West Pencil Pine	Female	2012	DFT1 confirmed	N, D1
1020	1020T1	982009106203255	West Pencil Pine	Female	2013	DFT1 confirmed	N, D1
1024	1024T1	982009104275775	West Pencil Pine	Female	2012	DFT1 confirmed	N, D1
1026	1026T1	982000190532654	West Pencil Pine	Female	2013	DFT1 confirmed	N, D1
1030	1030T1	982009104919599	West Pencil Pine	Female	2013	DFT1 confirmed	N, D1
1030	1030T3	982009104919599	West Pencil Pine	Female	2013	DFT1 confirmed	N, D1
202	202T1	982000190608331	Channel Peninsula	Male	2014	DFT2 confirmed	N, D2
203	203T1	982000356526917	Channel Peninsula	Male	2014	DFT2 confirmed	N, D2
203	203T2	982000356526917	Channel Peninsula	Male	2014	DFT2 confirmed	N, D2
638	638T1	982000363452012	Channel Peninsula	Male	2015	DFT2 confirmed	N, D2
638	638T2	982000363452012	Channel Peninsula	Male	2015	DFT2 confirmed	N, D2
807	807T1	R00000020151130	Channel Peninsula	Male	2015	DFT2 confirmed	N, D2
809	809T1	Unknown	Channel Peninsula	Male	2015	DFT2 confirmed	N, D2
812	812T1	982000356483454	Channel Peninsula	Female	2016	DFT2 confirmed	N, D2
338	338T	982000356669303	Channel Peninsula	Male	2015	DFT2 confirmed	N, D2
339	339T	982000167763080	Channel Peninsula	Male	2015	DFT2 confirmed	N, D2

## Sheet: Table S3B
Individual ID	Sample ID	Microchip	Location	Gender	Year	DFTD Diagnosis	Marker
11	11T2	Unknown	Nugent	Female	2006	DFTD suspected	N, D1
12	12T	Unknown	Tarraleah	Male	2006	DFTD suspected	N, D1
14	14T	Unknown	Mole Creek	Male	2006	DFTD suspected	N, D1
17	17T	Unknown	St Marys	Male	2006	DFTD suspected	N, D1
70	70T1	Unknown	Forestier	Female	2008	DFTD suspected	N, D1
71	71T1	Unknown	Forestier	Female	2008	DFTD suspected	N, D1
71	71T2	Unknown	Forestier	Female	2008	DFTD suspected	N, D1
71	71T3	Unknown	Forestier	Female	2008	DFTD suspected	N, D1
72	72T2	Unknown	Forestier	Male	2008	DFTD suspected	N, D1
82	82T	Unknown	Magra	Female	2008	DFTD suspected	N, D1
83	83T1	Unknown	Copping	Female	2008	DFTD suspected	N, D1
84	84T1	Unknown	Lovely Banks	Female	2006	DFTD suspected	N, D1
103	103T	982009106180012	West Pencil Pine	Male	2010	DFTD suspected	N, D1
104	104T	982009105179063	West Pencil Pine	Female	2010	DFTD suspected	N, D1
120	120T	982009104255241, 982009104235241	West Pencil Pine	Male	2010	DFTD suspected	N, D1
121	121T	982009105146482	West Pencil Pine	Female	2010	DFTD suspected	N, D1
122	122T1	982009104325244	West Pencil Pine	Female	2010	DFTD suspected	N, D1
128	128T1	982009104888854	West Pencil Pine	Female	2010	DFTD suspected	N, D1
169	169T	982009104236737	West Pencil Pine	Female	2011	DFTD suspected	N, D1
171	171T	982009104818438	West Pencil Pine	Female	2011	DFTD suspected	N, D1
173	173T1	982009104914526	West Pencil Pine	Female	2011	DFTD suspected	N, D1
177	177T1	982009104246911	West Pencil Pine	Female	2011	DFTD suspected	N, D1
190	190T1	982009104979666	West Pencil Pine	Male	2011	DFTD suspected	N, D1
190	190T3	982009104979666	West Pencil Pine	Male	2011	DFTD suspected	N, D1
196	196T1	982000191010985	West Pencil Pine	Male	2014	DFTD suspected	N, D1
196	196T2	982000191010985	West Pencil Pine	Male	2014	DFTD suspected	N
205	205T1	982009106161656	Neika	Female	2015	DFTD suspected	N, D1
206	206T1	982009105828528	Neika	Female	2015	DFTD suspected	N, D1
206	206T2	982009105828528	Neika	Female	2015	DFTD suspected	N, D1
206	206T3	982009105828528	Neika	Female	2015	DFTD suspected	N, D1
206	206T4	982009105828528	Neika	Female	2015	DFTD suspected	N, D1
206	206T5	982009105828528	Neika	Female	2015	DFTD suspected	N, D1
208	208T1	Unknown	Richmond	Female	2015	DFTD suspected	N, D1
208	208T2	Unknown	Richmond	Female	2015	DFTD suspected	N, D1
213	213T1	S00000000006241	Leslie Vale	Female	2015	DFTD suspected	N, D1
222	222T1	982000190698061	West Pencil Pine	Female	2015	DFTD suspected	N, D1
222	222T2	982000190698061	West Pencil Pine	Female	2015	DFTD suspected	N, D1
223	223T1	982000167782358	West Pencil Pine	Male	2015	DFTD suspected	N, D1
223	223T2	982000167782358	West Pencil Pine	Male	2015	DFTD suspected	N, D1
224	224T1	982000167788545	West Pencil Pine	Female	2015	DFTD suspected	N, D1
225	225T1	982000167809213	West Pencil Pine	Male	2015	DFTD suspected	N, D1
226	226T1	982000167787241	West Pencil Pine	Male	2015	DFTD suspected	N, D1
226	226T2	982000167787241	West Pencil Pine	Male	2015	DFTD suspected	N
226	226T4	982000167787241	West Pencil Pine	Male	2015	DFTD suspected	N, D1
227	227T1	982000167790882	West Pencil Pine	Female	2015	DFTD suspected	N, D1
227	227T2	982000167790882	West Pencil Pine	Female	2015	DFTD suspected	N, D1
228	228T1	982000190700288	West Pencil Pine	Female	2015	DFTD suspected	N, D1
228	228T2	982000190700288	West Pencil Pine	Female	2015	DFTD suspected	N, D1
229	229T2	982000190526288	West Pencil Pine	Female	2014	DFTD suspected	N, D1
230	230T1	900006000172560	Takone	Male	2015	DFTD suspected	N, D1
231	231T2	982009106147383	Takone	Male	2015	DFTD suspected	N, D1
236	236T1a	982009106522128	Bronte Park	Female	2015	DFTD suspected	N, D1
236	236T3	982009106522128	Bronte Park	Female	2015	DFTD suspected	N, D1
257	257T3	982009106498256	Fentonbury	Female	2015	DFTD suspected	N, D1
267	267T1	982000123159734	Buckland	Male	2015	DFTD suspected	N, D1
328	328T1	SDD000000200415	Judbury	Female	2015	DFTD suspected	N, D1
328	328T2	SDD000000200415	Judbury	Female	2015	DFTD suspected	N, D1
328	328T3	SDD000000200415	Judbury	Female	2015	DFTD suspected	N, D1
329	329T1	SDD000000280315	Chauncy Vale	Female	2015	DFTD suspected	N, D1
329	329T2	SDD000000280315	Chauncy Vale	Female	2015	DFTD suspected	N, D1
330	330T1	SDD000000030415	Franklin	Female	2015	DFTD suspected	N, D1
330	330T2	SDD000000030415	Franklin	Female	2015	DFTD suspected	N, D1
341	341T	982000191010174	Brighton	Intersex	2015	DFTD suspected	N, D1
369	369T2	Unknown	Epping Forest	Female	2003	DFTD suspected	N
382	382T1	985120016101648	Forestier	Unknown	2006	DFTD suspected	N, D1
461	461T	982009106307588	Narawntapu	Female	2014	DFTD suspected	N, D1
462	462T1	982009106545752	Narawntapu	Male	2014	DFTD suspected	N, D1
462	462T2	982009106545752	Narawntapu	Male	2014	DFTD suspected	N, D1
462	462T3	982009106545752	Narawntapu	Male	2014	DFTD suspected	N, D1
463	463T1	900006000170359	Takone	Male	2014	DFTD suspected	N, D1
463	463T2	900006000170359	Takone	Male	2014	DFTD suspected	N, D1
463	463T3	900006000170359	Takone	Male	2014	DFTD suspected	N, D1
463	463T4	900006000170359	Takone	Male	2014	DFTD suspected	N, D1
464	464T1	900006000171526	Takone	Female	2014	DFTD suspected	N, D1
464	464T2	900006000171526	Takone	Female	2014	DFTD suspected	N, D1
465	465T1	982000123131193	Takone	Male	2014	DFTD suspected	N, D1
467	467T1	982009106537113	Bronte Park	Female	2014	DFTD suspected	N
468	468T1	982009106576379	Bronte Park	Male	2014	DFTD suspected	N, D1
469	469T1	982009106585954	Bronte Park	Female	2014	DFTD suspected	N, D1
470	470T1	982009106589216	Bronte Park	Female	2014	DFTD suspected	N, D1
471	471T1	982000191010994	Kempton	Female	2014	DFTD suspected	N, D1
471	471T2	982000191010994	Kempton	Female	2014	DFTD suspected	N, D1
472	472T2	982000191016500	Kempton	Female	2014	DFTD suspected	N, D1
472	472T5	982000191016500	Kempton	Female	2014	DFTD suspected	N, D1
473	473T1	982000190529814	Fentonbury	Male	2014	DFTD suspected	N, D1
473	473T3	982000190529814	Fentonbury	Male	2014	DFTD suspected	N, D1
474	474T1	982009106680871	Fentonbury	Female	2014	DFTD suspected	N, D1
475	475T2	982000123120536	Buckland	Female	2014	DFTD suspected	N, D1
475	475T3	982000123120536	Buckland	Female	2014	DFTD suspected	N, D1
475	475T4	982000123120536	Buckland	Female	2014	DFTD suspected	N, D1
476	476T2	982000356669378	Stony Head	Female	2014	DFTD suspected	N, D1
476	476T3	982000356669378	Stony Head	Female	2014	DFTD suspected	N, D1
477	477T2	982000356675708	Stony Head	Male	2014	DFTD suspected	N, D1
477	477T3	982000356675708	Stony Head	Male	2014	DFTD suspected	N, D1
477	477T4	982000356675708	Stony Head	Male	2014	DFTD suspected	N, D1
477	477T5	982000356675708	Stony Head	Male	2014	DFTD suspected	N, D1
478	478T1	982000356483242	Stony Head	Male	2014	DFTD suspected	N, D1
478	478T2	982000356483242	Stony Head	Male	2014	DFTD suspected	N, D1
480	480T1	982009106485186	Narawntapu	Male	2015	DFTD suspected	N, D1
480	480T2	982009106485186	Narawntapu	Male	2015	DFTD suspected	N
610	610T1	982009106499858	Bronte Park	Male	2014	DFTD suspected	N, D1
626	626T1	982000123208441	Bronte Park	Female	2015	DFTD suspected	N, D1
636	636T1	982000363485080	Buckland	Female	2015	DFTD suspected	N, D1
808	808T1	982009106536238	Narawntapu	Male	2015	DFTD suspected	N, D1
811	811T1	S000000120116	Channel Peninsula	Male	2016	DFTD suspected	N, D1
811	811T2	S000000120116	Channel Peninsula	Male	2016	DFTD suspected	N, D1
811	811T3	S000000120116	Channel Peninsula	Male	2016	DFTD suspected	N
811	811T4	S000000120116	Channel Peninsula	Male	2016	DFTD suspected	N, D1
811	811T5	S000000120116	Channel Peninsula	Male	2016	DFTD suspected	N
812	812T2	982000356483454	Channel Peninsula	Female	2016	DFTD suspected	N, D1
812	812T3	982000356483454	Channel Peninsula	Female	2016	DFTD suspected	N, D1
813	813T1	982000361951310	Channel Peninsula	Female	2016	DFTD suspected	N, D1
814	814T1	982000167806989	Channel Peninsula	Male	2016	DFTD suspected	N, D1
816	816T1	982000363454219	Channel Peninsula	Female	2016	DFTD suspected	N, D1
816	816T2	982000363454219	Channel Peninsula	Female	2016	DFTD suspected	N, D1
818	818T2	982000167740522	Channel Peninsula	Male	2016	DFTD suspected	N, D1
818	818T4	982000167740522	Channel Peninsula	Male	2016	DFTD suspected	N
819	819T1	982000167812844	West Pencil Pine	Female	2014	DFTD suspected	N, D1
823	823T1	982009104983733	West Pencil Pine	Female	2009	DFTD suspected	N, D1
825	825T1	982000167814762	West Pencil Pine	Female	2014	DFTD suspected	N, D1
825	825T2	982000167814762	West Pencil Pine	Female	2014	DFTD suspected	N, D1
875	875T5	Unknown	Channel Peninsula	Male	2016	DFTD suspected	N, D1
877	877T1	Unknown	Huonville	Male	2016	DFTD suspected	N, D1
983	983T1	982000363404057	Stony Head	Male	2016	DFTD suspected	N, D1
983	983T2	982000363404057	Stony Head	Male	2016	DFTD suspected	N, D1
992	992T1	982000363392177	Granville Harbour	Male	2016	DFTD suspected	N, D1
1001	1001T1	982000191008016	West Pencil Pine	Male	2013	DFTD suspected	N, D1
1003	1003T1	982000356429834	West Pencil Pine	Female	2015	DFTD suspected	N, D1
1004	1004T1	982000356574585	West Pencil Pine	Female	2016	DFTD suspected	N, D1
1004	1004T2	982000356574585	West Pencil Pine	Female	2016	DFTD suspected	N, D1
1005	1005T1	982000167783273	West Pencil Pine	Female	2014	DFTD suspected	N, D1
1005	1005T2	982000167783273	West Pencil Pine	Female	2014	DFTD suspected	N
1006	1006T1	982000167813037	West Pencil Pine	Male	2012	DFTD suspected	N, D1
1007	1007T1	982000190533626	West Pencil Pine	Male	2014	DFTD suspected	N, D1
1008	1008T1	982000167808001	West Pencil Pine	Male	2014	DFTD suspected	N, D1
1009	1009T1	982009104798071	West Pencil Pine	Male	2011	DFTD suspected	N, D1
1011	1011T1	982000167789148	West Pencil Pine	Male	2012	DFTD suspected	N, D1
1011	1011T2	982000167789148	West Pencil Pine	Male	2012	DFTD suspected	N, D1
1011	1011T3	982000167789148	West Pencil Pine	Male	2012	DFTD suspected	N, D1
1012	1012T1	982000191009560	West Pencil Pine	Male	2014	DFTD suspected	N, D1
1013	1013T1	982009104909961	West Pencil Pine	Female	2013	DFTD suspected	N, D1
1016	1016T2	982000190606471	West Pencil Pine	Male	2013	DFTD suspected	N, D1
1017	1017T3	982000167786788	West Pencil Pine	Female	2013	DFTD suspected	N, D1
1017	1017T4	982000167786788	West Pencil Pine	Female	2013	DFTD suspected	N, D1
1018	1018T1	982000167813268	West Pencil Pine	Male	2013	DFTD suspected	N, D1
1021	1021T1	982000167782584	West Pencil Pine	Female	2014	DFTD suspected	N, D1
1022	1022T1	982000167811000	West Pencil Pine	Female	2013	DFTD suspected	N, D1
1022	1022T2	982000167811000	West Pencil Pine	Female	2013	DFTD suspected	N, D1
1023	1023T1	982009106181561	West Pencil Pine	Male	2012	DFTD suspected	N, D1
1023	1023T2	982009106181561	West Pencil Pine	Male	2012	DFTD suspected	N, D1
1025	1025T1	982009105854600	West Pencil Pine	Male	2012	DFTD suspected	N
1025	1025T2	982009105854600	West Pencil Pine	Male	2012	DFTD suspected	N, D1
1027	1027T1	982009106180793	West Pencil Pine	Male	2012	DFTD suspected	N, D1
1027	1027T2	982009106180793	West Pencil Pine	Male	2012	DFTD suspected	N, D1
1027	1027T3	982009106180793	West Pencil Pine	Male	2012	DFTD suspected	N, D1
1028	1028T1	982000190604602	West Pencil Pine	Male	2013	DFTD suspected	N, D1
1031	1031T2	982009104909578	West Pencil Pine	Female	2012	DFTD suspected	N, D1
1032	1032T1	982000362816049	West Pencil Pine	Female	2015	DFTD suspected	N, D1
1032	1032T2	982000362816049	West Pencil Pine	Female	2015	DFTD suspected	N, D1
1033	1033T1	982000190532991	West Pencil Pine	Male	2013	DFTD suspected	N, D1
1034	1034T1	982000190610576	West Pencil Pine	Male	2013	DFTD suspected	N, D1
1035	1035T1	982000167811270	West Pencil Pine	Male	2014	DFTD suspected	N
1036	1036T1	982000190605291	West Pencil Pine	Female	2013	DFTD suspected	N, D1
1037	1037T1	982000167786887	West Pencil Pine	Female	2014	DFTD suspected	N, D1
1038	1038T1	982000190609040	West Pencil Pine	Female	2013	DFTD suspected	N, D1
1038	1038T2	982000190609040	West Pencil Pine	Female	2013	DFTD suspected	N, D1
1039	1039T1	982000356425037	West Pencil Pine	Female	2015	DFTD suspected	N, D1
1040	1040T1	982000167810816	West Pencil Pine	Female	2013	DFTD suspected	N
1041	1041T1	982000167813159	West Pencil Pine	Female	2012	DFTD suspected	N, D1
1042	1042T1	982000190609271	West Pencil Pine	Male	2013	DFTD suspected	N, D1
212	212T	S0000000006148	Channel Peninsula	Male	2014	DFTD suspected	N, D2
637	637T1	982000363393409	Channel Peninsula	Female	2015	DFTD suspected	N, D2
637	637T2	982000363393409	Channel Peninsula	Female	2015	DFTD suspected	N, D2
818	818T1	982000167740522	Channel Peninsula	Male	2016	DFTD suspected	N, D2
818	818T3	982000167740522	Channel Peninsula	Male	2016	DFTD suspected	N, D2

## Sheet: Table S3C
Individual ID	Sample ID	Microchip	Location	Gender	Year	DFTD Diagnosis	Marker	Diagnosis
97	97T	Unknown	Captive	Female	2010	Non-DFTD	N	Squamous cell carcinoma
106	106T1	0006444E9C	Captive	Female	2010	Non-DFTD	N	Cutaneous lymphoma
106	106T2	0006444E9C	Captive	Female	2010	Non-DFTD	N	Cutaneous lymphoma
106	106T3	0006444E9C	Captive	Female	2010	Non-DFTD	N	Cutaneous lymphoma
131	131T	Unknown	Captive	Female	2011	Non-DFTD	N	Lymphoma
138	138T	Unknown	Captive	Female	2012	Non-DFTD	N	Metastatic squamous cell carcinoma
184	184T1	982009104821392	West Pencil Pine	Female	2011	Non-DFTD	N	Fibroplasia
200	200T1.1	982009106094895	West Pencil Pine	Male	2014	Non-DFTD	N	Inflammamed tissue
210	210T	R0000000006095	Channel Peninsula	Male	2014	Non-DFTD	N	Sebaceous cyst
337	337T	982009106029485	Channel Peninsula	Male	2015	Non-DFTD	N	Papilloma
340	340T	982009104723843	Captive	Male	2015	Non-DFTD	N	Anal sac squamous cell carcinoma
352	352T1	982009106314654	Captive	Male	2010	Non-DFTD	N	Cutaneous lymphoma
359	359T1	985120016024404	Captive	Female	2011	Non-DFTD	N	Cutaneous lymphoma
362	362T1	00068B9B8A	Captive	Female	2012	Non-DFTD	N	Cutaneous papilloma
373	373T1	Unknown	Bronte Park	Female	2004	Non-DFTD	N	Mammary gland squamous metaplasia
376	376T1	Unknown	Narawntapu	Male	2004	Non-DFTD	N	Liver fibrosarcoma
391	391T1	982009100399347	Forestier	Male	2007	Non-DFTD	N	Unknown
418	418T1	982009100852046	Badger Island	Female	2008	Non-DFTD	N	Mammary adenocarcinoma
435	435T	982009100786171	Badger Island	Female	2009	Non-DFTD	N	Cutaneous lymphoma
441	441T1	985154000001173	Beaconsfield	Female	2009	Non-DFTD	N	Cutaneous round cell tumour
443	443T1	982009104925128	Forestier	Male	2009	Non-DFTD	N	Inflammamed tissue
452	452T1	982009101476169	Cressy	Female	2009	Non-DFTD	N	Squamous cell carcinoma
500	500T1	982000190609596	Granville Harbour	Male	2016	Non-DFTD	N	Reactive fibrovascular tissue
630	630T5	982000363454290	Fentonbury	Male	2015	Non-DFTD	N	Chronic dermatitis
815	815T1	982000363454892	Kaoota	Male	2016	Non-DFTD	N	Scar tissue (suspected)
984	984T1	982000363460533	Granville Harbour	Male	2016	Non-DFTD	N	Inflammed dermatitis
997	997T1	Unknown	Captive	Female	2013	Non-DFTD	N	Anal sac squamous cell carcinoma
